# Supplementary material
Source: PubMed Central journal article supplement (PMC4981676)
Supplement: 80.3.793_zmr003162434so1.pdf [file 80.3.793_zmr003162434so1.pdf]

***JNK signaling: regulation and functions based on complex protein-protein partnerships***

**Zeke, Misheva, Remenyi & Bogoyevitch 2016**

**Supplementary File containing:**

- **Figure S1 (page 2) - Overview of JNK substrate proteins**
- **Table S1 (page 3) - Critical assessment of scaffold proteins implicated in the mammalian JNK pathway**
- **Table S2 (page 7) - Sequences of mutually exclusive exons for the human JNK genes**

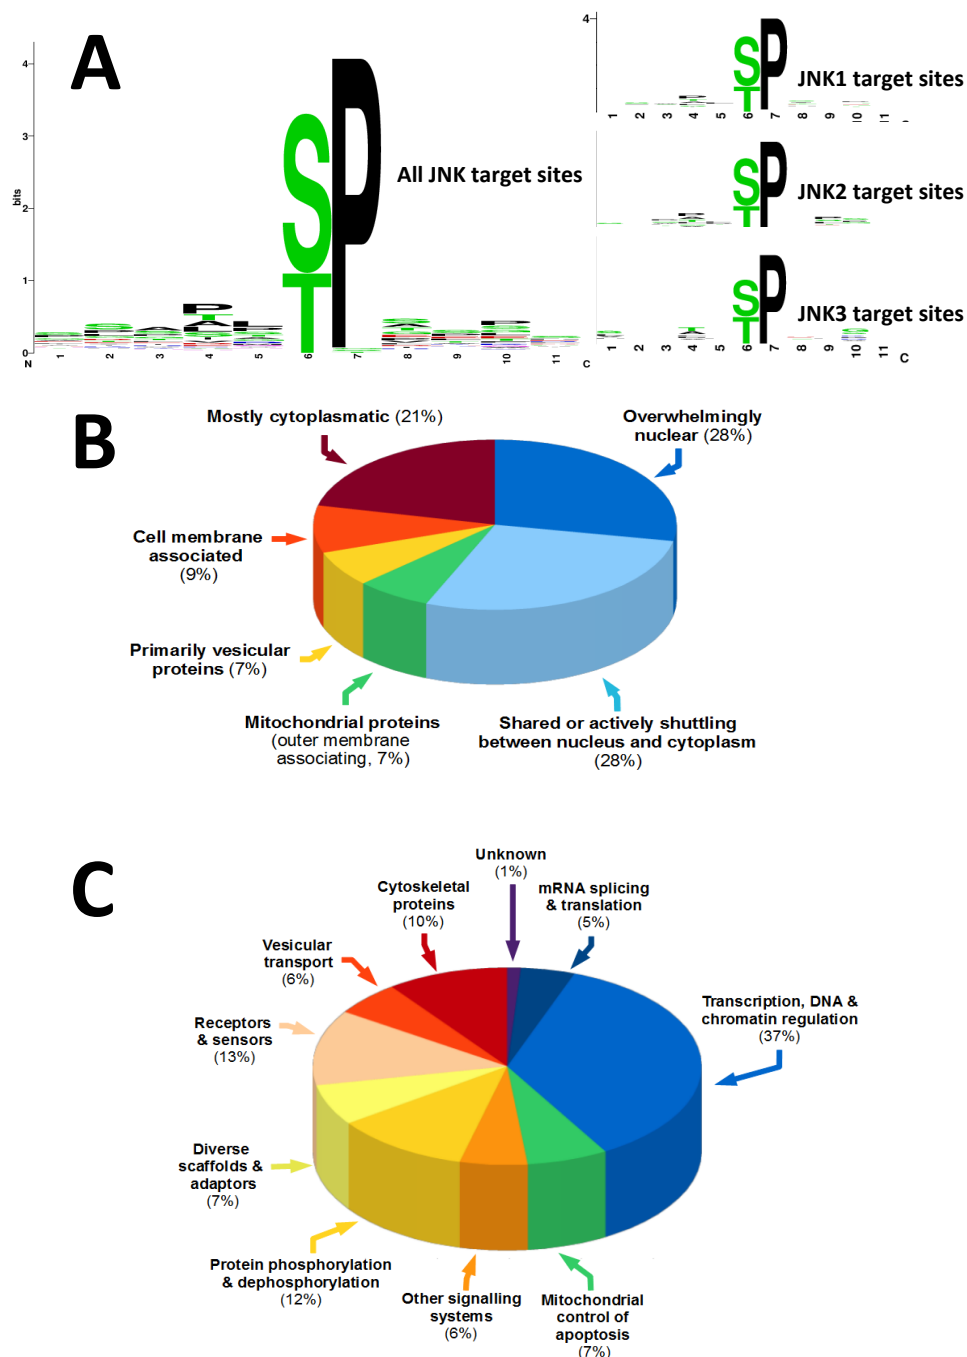

**FIGURE S1: Overview of JNK substrate proteins.** **A.** Consensus sequence motif for JNK-mediated phosphorylation. Sequences surrounding confirmed JNK substrate sites were analysed (*i.e.* the sequences encompassing 5 amino acids N-terminal of the targeted Ser/Thr residue followed by the 5 C-terminal amino acids were included for analysis). The analysis included 176 phosphorylation sites in 89 different confirmed well-validated substrate proteins (see **Table 1** for details of which proteins were considered as well-validated substrates so that their JNK-targeted phosphorylation sites were included in this analysis). Where possible, the sites identified for the different JNK isoform, JNK1, JNK2 or JNK3, were also assessed. 62 of the JNK-targeted phospho-sites (from 23 proteins) co-occur with known JNK docking motifs (see **Table 1** for further details). The ratio of known JNK target sites per protein is 1.98 for all JNK substrates (*i.e.* 176 sites in 89 proteins), 2.70 for proteins possessing a known JNK binding D-motif (*i.e.* 62 sites in 23 proteins), and only 1.73 for proteins devoid of known D-motifs (*i.e.* 114 sites in 66 proteins). **B.** Subcellular distribution of confirmed JNK substrates. The majority of confirmed JNK substrates either shuttle between nucleus and cytoplasm (28%) or are located in the nucleus (28%) or the cytoplasm (21%). 9% are cell membrane associated, 7% are associated with the mitochondrial outer membrane, and 5% are primarily vesicular proteins. **C.** Functional classification of confirmed JNK substrates. The majority of confirmed JNK substrates are involved in transcription/DNA/chromatin regulation (37%); other functional groups include receptors and signaling sensor proteins (13%), proteins directly involved in protein phosphorylation/dephosphorylation (12%), and cytoskeleton proteins (10%).

**Table S1. Critical assessment of scaffold proteins implicated in the mammalian JNK pathway**

| Name and primary function of proposed scaffold                         | Evidence for binding of multiple JNK pathway members                      | Mapping of binding sites                               | Enhancement of JNK activation | Mechanism of JNK pathway enhancement                                                       | Selected references |
|------------------------------------------------------------------------|---------------------------------------------------------------------------|--------------------------------------------------------|-------------------------------|--------------------------------------------------------------------------------------------|---------------------|
| <b>JIP1</b><br><i>vesicular transport adaptor</i>                      | Yes<br>(MLK3/DLK, MKK7, JNK1) (I)                                         | Yes, but some sites may overlap                        | Yes<br>(in cells only)        | Explored<br>(transport based with some details unclear, see main text)                     | (1)                 |
| <b>JIP3</b><br><i>probable Rho-GEF protein</i>                         | Yes<br>(ASK1, MKK4, JNK1)                                                 | Yes,<br>except for MKK4                                | Yes<br>(in cells only)        | Partly explored<br>(either small GTPase based feedback or shared with JIP1, see main text) | (2)                 |
| <b>Beta arrestins</b><br><i>receptor endocytosis adaptors</i>          | Yes<br>(ASK1, JNK3, do not seem to bind MKK4 directly) (II)               | Yes, but some sites may overlap                        | Yes<br>(Arrestin $\beta$ 3)   | Not addressed                                                                              | (3, 4)              |
| <b>Filamin A &amp; Filamin B</b><br><i>actin crosslinking proteins</i> | Yes<br>(Rac1, MEKK1, MKK4, JNK1) for Filamin B only                       | Yes, but problematic due to binding site overlaps (IV) | Yes<br>(in cells only)        | Not addressed                                                                              | (5, 6)              |
| <b>RACK1</b><br><i>ribosomal protein (a 40S subunit component)</i>     | Incomplete<br>(JNK1/2 and PKC only)                                       | Yes, but in conflict with structure (V)                | Yes<br>(in cells only)        | Explored (VIII)<br>(but in conflict with structure)                                        | (7)                 |
| <b>Crk (isoform II)</b><br><i>SH2/SH3 adaptor protein</i>              | Incomplete<br>(JNK, but others are indirect only)                         | Yes, but in conflict with structure (VI)               | Yes<br>(in cells only)        | Not addressed                                                                              | (8)                 |
| <b>POSH</b><br><i>E3 ubiquitin ligase (RING type)</i>                  | Questionable (III)<br>(strong binder: MLK2, MLK3, DLK, weak binder: MKK4, | Not addressed                                          | Yes<br>(in cells only)        | Not addressed                                                                              | (9-11)              |

| Name and primary function of proposed scaffold        | Evidence for binding of multiple JNK pathway members    | Mapping of binding sites                  | Enhancement of JNK activation | Mechanism of JNK pathway enhancement | Selected references |
|-------------------------------------------------------|---------------------------------------------------------|-------------------------------------------|-------------------------------|--------------------------------------|---------------------|
|                                                       | MKK7, JNK2)                                             |                                           |                               |                                      |                     |
| <b>WDR62</b><br><i>microtubule-binding protein</i>    | Yes<br>(MKK7: MKK7- $\beta$ 1 isoform only, JNK1, JNK2) | Yes                                       | Not addressed                 | Not addressed                        | (12)                |
| <b>DUSP19</b><br><i>dual specificity phosphatase</i>  | Yes<br>(MKK7, JNK2)                                     | Yes, but in conflict with structure (VII) | Not addressed                 | Not addressed                        | (13)                |
| <b>GRASP1</b><br><i>ion channel anchoring protein</i> | Yes<br>(MEKK1, JNK1)                                    | Yes                                       | Yes<br>(in cells only)        | Not addressed                        | (14)                |

**(I)** *JIP1* has been reported to binding several other signalling components including *Notch1* (15), the Ser/Thr kinase *Akt1* (16, 17), the Tyr kinase *c-Abl* (18), the Src family of Tyr kinases (19, 20) and the Ras-like small G-protein *RalA* and its GTP exchange factor *RLF* (21).

**(II)** Beta-arrestins interact with the N-terminus of *JNK3* (long isoform only), and also with *ASK1*, however the relation of these binding sites (on beta arrestin) is obscure: comparable binding was seen for all kinases with both the N-terminal and the C-terminal arrestin domains. The experiments of Song et al. might even suggest competition between *ASK1* and *JNK3* (3). No direct interaction was found with *MKK4*: this kinase was shown to be recruited indirectly, through the D-site of *JNK3*.

**(III)** *POSH* interacted with *MAP3Ks* directly, but not with other components of the JNK pathway. The latter interactions were only detectable in cells, but not in pull-downs: thus, they were likely indirect.

**(IV)** *MEKK1*, *MKK4* and *JNK* all appeared to bind to largely overlapping site(s) on *filamin B*. However, the constructs created for these mapping studies would structurally disrupt the rod domain (repeats 16-23) of *filamin B*, so the conclusions drawn from these studies appear problematic. Furthermore, *GTP-Rac1* is probably not a direct regulator of *MEKK1* activity (22).

*(V) The mapping of binding sites was problematic, since all WD40 repeats of RACK1 would normally fold together to form a single domain. Most known WD40 domains only have a single partner binding site, in the center of the WD40 domain "wheel" (the complete, closed solenoid domain) (23).*

*(VI) CrkII was proposed to bind to a segment of the JNK1 kinase domain that is normally inaccessible, as most of its side chains forming the SH3 binding motif consensus are buried under native conditions.*

*(VII) Interactions were not mapped on DUSP19, only on MKK7. However, the latter bound very weakly as an intact protein; strong bindings were only obtained with fragments where the N-terminal lobe of the kinase domain was disrupted.*

*(VIII) The authors proposed a novel pathway in which PKC-dependent phosphorylation would activate JNKs. Because the site S129 is deeply buried in the kinase domain of JNK1, S129 phosphorylation appears unlikely in its native state whereas the mutation S129A likely disrupts JNK folding and enzymatic activity.*

## REFERENCES:

1. **Nihalani D, Wong HN, Holzman LB.** 2003. Recruitment of JNK to JIP1 and JNK-dependent JIP1 phosphorylation regulates JNK module dynamics and activation. *J Biol Chem* **278**:28694-28702.
2. **Matsuura H, Nishitoh H, Takeda K, Matsuzawa A, Amagasa T, Ito M, Yoshioka K, Ichijo H.** 2002. Phosphorylation-dependent scaffolding role of JSAP1/JIP3 in the ASK1-JNK signaling pathway. A new mode of regulation of the MAP kinase cascade. *J Biol Chem* **277**:40703-40709.
3. **Song X, Coffa S, Fu H, Gurevich VV.** 2009. How does arrestin assemble MAPKs into a signaling complex? *J Biol Chem* **284**:685-695.
4. **Guo C, Whitmarsh AJ.** 2008. The beta-arrestin-2 scaffold protein promotes c-Jun N-terminal kinase-3 activation by binding to its nonconserved N terminus. *J Biol Chem* **283**:15903-15911.
5. **Marti A, Luo Z, Cunningham C, Ohta Y, Hartwig J, Stossel TP, Kyriakis JM, Avruch J.** 1997. Actin-binding protein-280 binds the stress-activated protein kinase (SAPK) activator SEK-1 and is required for tumor necrosis factor-alpha activation of SAPK in melanoma cells. *J Biol Chem* **272**:2620-2628.
6. **Jeon YJ, Choi JS, Lee JY, Yu KR, Ka SH, Cho Y, Choi EJ, Baek SH, Seol JH, Park D, Bang OS, Chung CH.** 2008. Filamin B serves as a molecular scaffold for type I interferon-induced c-Jun NH2-terminal kinase signaling pathway. *Mol Biol Cell* **19**:5116-5130.
7. **Lopez-Bergami P, Habelhah H, Bhoumik A, Zhang W, Wang LH, Ronai Z.** 2005. RACK1 mediates activation of JNK by protein kinase C [corrected]. *Mol Cell* **19**:309-320.
8. **Girardin SE, Yaniv M.** 2001. A direct interaction between JNK1 and CrkII is critical for Rac1-induced JNK activation. *EMBO J* **20**:3437-3446.
9. **Xu Z, Kukekov NV, Greene LA.** 2003. POSH acts as a scaffold for a multiprotein complex that mediates JNK activation in apoptosis. *EMBO J* **22**:252-261.
10. **Kukekov NV, Xu Z, Greene LA.** 2006. Direct interaction of the molecular scaffolds POSH and JIP is required for apoptotic activation of JNKs. *J Biol Chem* **281**:15517-15524.
11. **Wilhelm M, Kukekov NV, Schmit TL, Biagas KV, Sproul AA, Gire S, Maes ME, Xu Z, Greene LA.** 2012. Sh3rf2/POSHER protein promotes cell survival by ring-mediated proteasomal degradation of the c-Jun N-terminal kinase scaffold POSH (Plenty of SH3s) protein. *J Biol Chem* **287**:2247-2256.
12. **Cohen-Katsenelson K, Wasserman T, Khateb S, Whitmarsh AJ, Aronheim A.** 2011. Docking interactions of the JNK scaffold protein WDR62. *Biochem J* **439**:381-390.
13. **Zama T, Aoki R, Kamimoto T, Inoue K, Ikeda Y, Hagiwara M.** 2002. Scaffold role of a mitogen-activated protein kinase phosphatase, SKRP1, for the JNK signaling pathway. *J Biol Chem* **277**:23919-23926.
14. **Ye B, Yu WP, Thomas GM, Huganir RL.** 2007. GRASP-1 is a neuronal scaffold protein for the JNK signaling pathway. *FEBS Lett* **581**:4403-4410.

15. **Kim MY, Ann EJ, Mo JS, Dajas-Bailador F, Seo MS, Hong JA, Jung J, Choi YH, Yoon JH, Kim SM, Choi EJ, Hoe HS, Whitmarsh AJ, Park HS.** 2010. JIP1 binding to RBP-Jk mediates cross-talk between the Notch1 and JIP1-JNK signaling pathway. *Cell Death Differ* **17**:1728-1738.
16. **Kim AH, Sasaki T, Chao MV.** 2003. JNK-interacting protein 1 promotes Akt1 activation. *J Biol Chem* **278**:29830-29836.
17. **Dajas-Bailador F, Bantounas I, Jones EV, Whitmarsh AJ.** 2014. Regulation of axon growth by the JIP1-AKT axis. *J Cell Sci* **127**:230-239.
18. **Dajas-Bailador F, Jones EV, Whitmarsh AJ.** 2008. The JIP1 scaffold protein regulates axonal development in cortical neurons. *Curr Biol* **18**:221-226.
19. **Nihalani D, Wong H, Verma R, Holzman LB.** 2007. Src family kinases directly regulate JIP1 module dynamics and activation. *Mol Cell Biol* **27**:2431-2441.
20. **Kennedy NJ, Martin G, Ehrhardt AG, Cavanagh-Kyros J, Kuan CY, Rakic P, Flavell RA, Treisman SN, Davis RJ.** 2007. Requirement of JIP scaffold proteins for NMDA-mediated signal transduction. *Genes Dev* **21**:2336-2346.
21. **van den Berg MC, van Gogh IJ, Smits AM, van Triest M, Dansen TB, Visscher M, Polderman PE, Vliem MJ, Rehmann H, Burgering BM.** 2013. The small GTPase RALA controls c-Jun N-terminal kinase-mediated FOXO activation by regulation of a JIP1 scaffold complex. *J Biol Chem* **288**:21729-21741.
22. **Gallagher ED, Gutowski S, Sternweis PC, Cobb MH.** 2004. RhoA binds to the amino terminus of MEKK1 and regulates its kinase activity. *J Biol Chem* **279**:1872-1877.
23. **Stirnemann CU, Petsalaki E, Russell RB, Muller CW.** 2010. WD40 proteins propel cellular networks. *Trends Biochem Sci* **35**:565-574.

**Table S2. Sequences of mutually exclusive exons for the human JNK genes**

The different amino acids in the corresponding exons of the same gene are underlined. The  $\alpha$  and  $\beta$  splice variants can be obtained by exchanging the shown sequences.

| Protein (gene) name    | Exon 6a - amino acid sequence                               | Exon 6b - amino acid sequence                               |
|------------------------|-------------------------------------------------------------|-------------------------------------------------------------|
| <b>JNK1 (MAPK8)</b>    | VDL <u>W</u> SVGCIMGEMV <u>C</u> HKILFPGR <u>D</u> <u>Y</u> | VDI <u>W</u> SWGCIMGEMIKGGVLFPGT <u>D</u> <u>H</u>          |
| <b>JNK2 (MAPK9) *</b>  | VDIWSVGCIMA <u>E</u> MVL <u>H</u> KVLFPGR <u>D</u> <u>Y</u> | VDIWSVGCIM <u>G</u> EL <u>V</u> KGCVIFQGT <u>D</u> <u>H</u> |
| <b>JNK3 (MAPK10)**</b> | VDI <u>W</u> SVGCIMGEM <u>V</u> RHKILFPGR <u>D</u> <u>Y</u> | VDM <u>W</u> SVGCIMGEMIKGAVLFPGT <u>D</u> <u>H</u>          |

\* In the case of JNK2, the names of the exon 6a- and 6b-incorporating isoforms are swapped due to historic reasons (i.e. exon 6a in the  $\beta$  isoforms and exon 6b in the  $\alpha$  isoforms)

\*\* The sequence of exon 6b-incorporating JNK3 proteins (JNK3  $\beta$ -isoforms) is based on mRNA sequences retrieved from ENSEMBL and NCBI and not featured in protein sequence databases (such as SwissProt/UniProt).
